# Supplementary material for: Combined and Sequential Treatment with Deep Brain Stimulation and Continuous Intrajejunal Levodopa Infusion for Parkinson’s Disease
Source: MDPI journal article supplement (doi:10.3390/jpm11060547), 2021-06-12
Supplement: s1 [file s1]

**Supplemental Table S1: Search Criteria**

| <i>Embase</i>  |                                                                                                                                                                                                                                                                                                                |         |
|----------------|----------------------------------------------------------------------------------------------------------------------------------------------------------------------------------------------------------------------------------------------------------------------------------------------------------------|---------|
| #              | Searches                                                                                                                                                                                                                                                                                                       | Results |
| 1              | exp Parkinson disease/ or PARKINSON*.ti,ab,kw,hw.                                                                                                                                                                                                                                                              | 228495  |
| 2              | (exp levodopa/ or exp carbidopa plus entacapone plus levodopa/ or exp carbidopa plus levodopa/ or exp levodopa methyl ester/ or (duodopa or levodopa or (levodopa adj2 carbidopa) or l-dopa).ti,ab,kw,rn,hw.) and (exp Intestine, Small/ or (infusion or intrajejunal or jejenum or continuous*).ti,ab,kw,hw.) | 3608    |
| 3              | brain depth stimulation/                                                                                                                                                                                                                                                                                       | 44674   |
| 4              | ("Deep brain stimulation" or dbs or "Subthalamic nucleus stimulation" or (STN adj2 stimulation) or ((gpi or globus) adj 2 stimulation) or (Thalamic adj2 stimulation)).ti,ab.                                                                                                                                  | 27127   |
| 5              | 3 or 4                                                                                                                                                                                                                                                                                                         | 53445   |
| 6              | 1 and 2 and 5                                                                                                                                                                                                                                                                                                  | 567     |
| <i>Medline</i> |                                                                                                                                                                                                                                                                                                                |         |
| #              | Searches                                                                                                                                                                                                                                                                                                       | Results |
| 1              | exp Deep Brain Stimulation/                                                                                                                                                                                                                                                                                    | 9167    |
| 2              | Deep brain stimulation.ti,ab.                                                                                                                                                                                                                                                                                  | 11612   |
| 3              | dbs.ti,ab.                                                                                                                                                                                                                                                                                                     | 10795   |
| 4              | Subthalamic nucleus stimulation.ti,ab.                                                                                                                                                                                                                                                                         | 428     |
| 5              | ((gpi or globus) adj 2 stimulation).ti,ab.                                                                                                                                                                                                                                                                     | 0       |
| 6              | (Thalamic adj2 stimulation).ti,ab.                                                                                                                                                                                                                                                                             | 700     |
| 7              | (STN adj2 stimulation).ti,ab.                                                                                                                                                                                                                                                                                  | 924     |
| 8              | 1 or 2 or 3 or 4 or 5 or 6 or 7                                                                                                                                                                                                                                                                                | 17871   |
| 9              | exp Parkinson Disease/                                                                                                                                                                                                                                                                                         | 69221   |
| 10             | parkinson*.ti,ab,kf.                                                                                                                                                                                                                                                                                           | 124970  |
| 11             | 9 or 10                                                                                                                                                                                                                                                                                                        | 132529  |
| 12             | (exp Levodopa/ or (duodopa or levodopa or (levodopa adj2 carbidopa) or l-dopa).ti,ab,kw,rn.) and (exp Intestine, Small/ or (infusion or intrajejunal or jejenum or continuous*).ti,ab,kf.)                                                                                                                     | 1610    |
| 13             | 8 and 11 and 12                                                                                                                                                                                                                                                                                                | 184     |
