# Supplementary material for: Combined and Sequential Treatment with Deep Brain Stimulation and Continuous Intrajejunal Levodopa Infusion for Parkinson’s Disease
Source: MDPI journal article supplement (doi:10.3390/jpm11060547), 2021-06-12
Supplement: s1 [file s1]

Supplement 2. **Table S2.** Comparing response to second advanced therapy.

|                                                        | <b>2<sup>nd</sup> treatment beneficial (n=12)</b> | <b>2<sup>nd</sup> treatment not beneficial (n=5)</b> | <b>p-value</b> |
|--------------------------------------------------------|---------------------------------------------------|------------------------------------------------------|----------------|
| Initial treatment                                      | CLI 7 DBS 5                                       | CLI 2 DBS 3                                          | 0.800          |
| Sex F (n out of total n; (%))                          | 3/12 (25%)                                        | 2/5 (40%)                                            | 0.787          |
| Mean age at PD diagnosis in years (SD)                 | 46.3 (6.4)                                        | 43.6 (7.8)                                           | 0.442          |
| Mean age at initiation initial treatment in years (SD) | 56.4 (7.8)                                        | 51.2 (7.2)                                           | 0.279          |
| Mean initial effect of first treatment, 0-4 (SD)       | 2.6 (1.0)                                         | 3.2 (0.5)                                            | 0.279          |
| Initial treatment beneficial                           | 7                                                 | 5                                                    | 0.077          |
| Mean interval between treatments in months (SD)        | 55.3 (24.7)                                       | 56.2 (27.2)                                          | 0.959          |
| Mean final LEDD (SD, n)                                | 1337 (862, n=11)                                  | 1733 (912 n=5)                                       | 0.441          |

CLI: Continuous Levodopa/carbidopa Infusion, DBS: Deep Brain Stimulation, LEDD: levodopa equivalent daily dose, PD: Parkinson's disease, SD: standard deviation.
